# Supplementary material for: Enhancing Ag-alloyed Cu2ZnSnS4 solar cell performance by interfacial modification via In and Al
Source: Royal Society of Chemistry journal article supplement (doi:10.1039/d1ta07928j), 2021-01-01
Supplement: d1ta07928j1.pdf [file d1ta07928j1.pdf]

## Supporting Information

### Enhancing Ag-alloyed $\text{Cu}_2\text{ZnSnS}_4$ solar cell performance by interfacial modification via In and Al

Ping Fan, Yang He, Guangxing Liang, Zhigao Xie, Zixuan Yu, Jinhong Lin, Shuo Chen, Zhuanghao Zheng, Jingting Luo, and Zhenghua Su\*

Shenzhen Key Laboratory of Advanced Thin Films and Applications, Key Laboratory of Optoelectronic Devices and Systems, College of Physics and Optoelectronic Engineering, Shenzhen University, Shenzhen, 518060, P. R. China  
E-mail: zhsu@szu.edu.cn

**Table S1** Device characteristics of CZTS solar cells with different Ag dopant (0%~7%).

| Devices    | PCE [%] | $V_{oc}$ [mV] | FF [%] | $J_{sc}$ [mA/cm <sup>2</sup> ] | $E_g$ [eV] |
|------------|---------|---------------|--------|--------------------------------|------------|
| Device-Ag0 | 6.4     | 640           | 59     | 16.9                           | 1.50       |
| Device-Ag1 | 7.0     | 662           | 62     | 17.1                           | 1.50       |
| Device-Ag3 | 7.6     | 671           | 64     | 17.5                           | 1.50       |
| Device-Ag5 | 7.3     | 676           | 63     | 17.1                           | 1.51       |
| Device-Ag7 | 5.7     | 681           | 51     | 16.5                           | 1.53       |

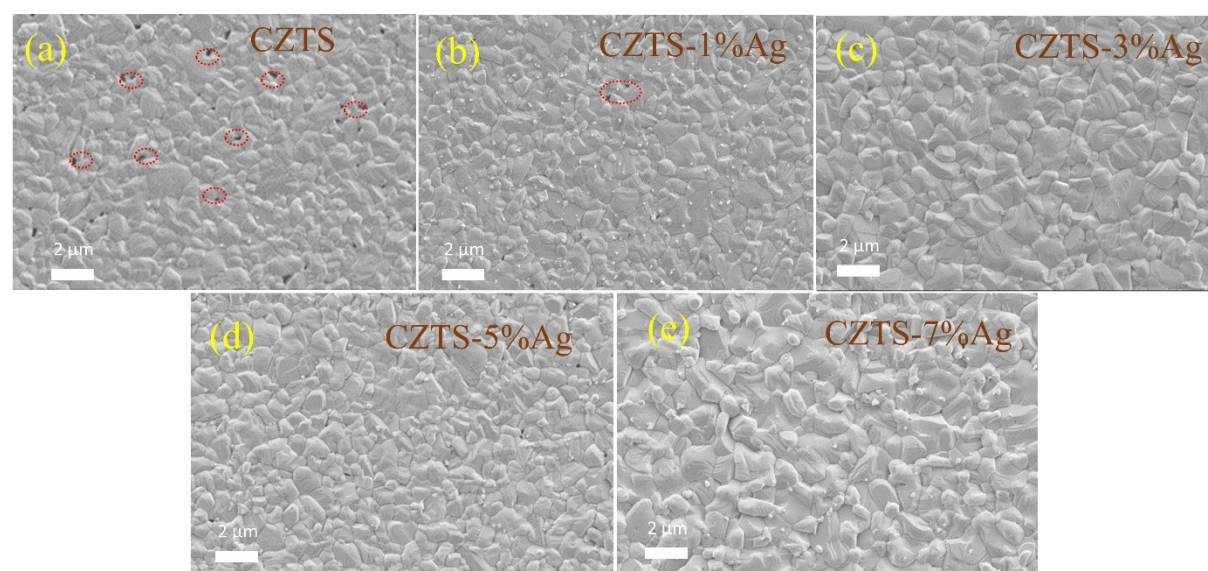

**Fig. S1** (a) ~ (e) Surface SEM images for CZTS thin films with different Ag doping.

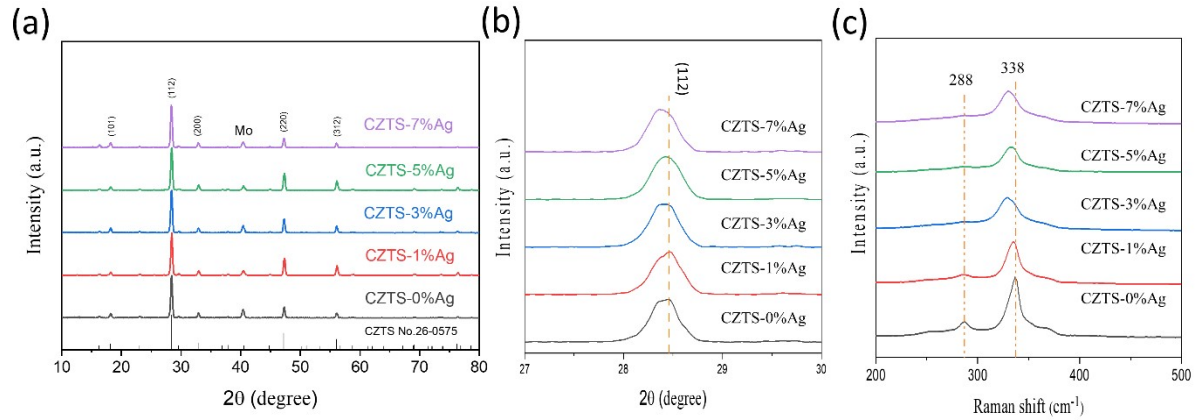

**Fig. S2** (a) XRD patterns for CZTS thin films with different Ag doping (b) Magnified region from 27–30 degree from XRD patterns (c) Raman spectra for CZTS thin films with different Ag doping.

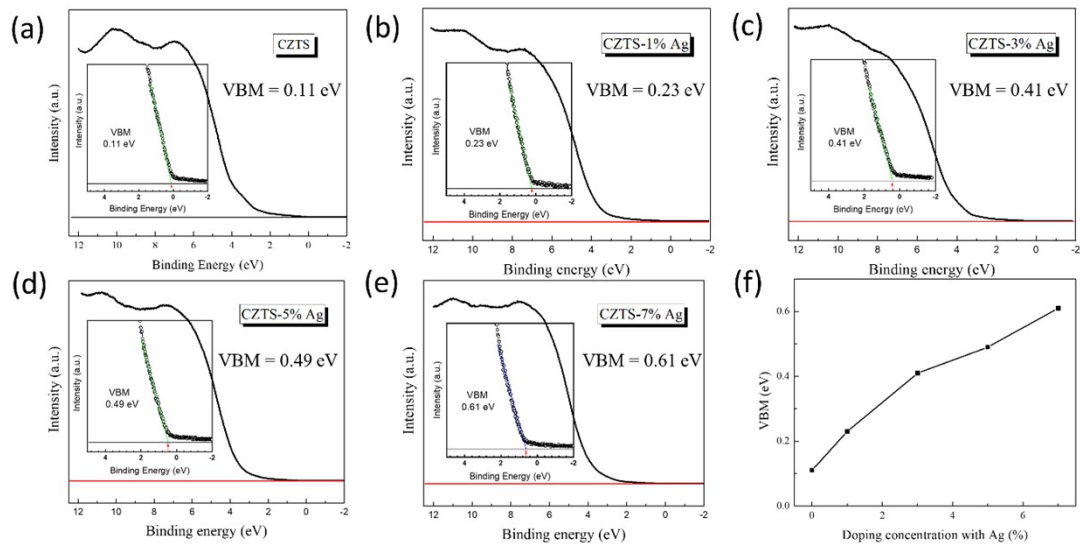

**Fig. S3** (a~f) UPS valence band data for CZTS thin films with different Ag doping concentration (0% ~ 7%). The inset pictures show the linear extrapolations for UPS data closed to valence band maximum.

### *Temperature dependent capacity frequency (CF-T) spectrum*

The capacity frequency (CF-T) spectrum (AS) of CZTS solar cells in the temperature range of 110–300 K are shown in Figure S4 and S5, and the corresponding Arrhenius plot for the inflection points in the AS is shown in Figure S6. The inflection point frequency  $\omega_0$  for each AS curve is determined by using the maximum point of  $\omega dC/d\omega$  vs.  $\omega$  plots. The fitting of the Arrhenius plot is given according to Equation 1.

$$\omega_0 = 2\pi\nu_0 T^2 \exp\left(\frac{-E_a}{\kappa T}\right) \quad (1)$$

where  $k$  is the Boltzmann constant,  $\omega_0$  is the step frequency,  $\nu_0$  is the average escaping frequency of the traps,  $E_a$  is the energy depth of the defect relative to the valence band maximum, which represents the average defect energy level in the band gap.

To obtain the energetic defect distribution for CZTS devices, the frequencies in CF scanning are converted into energies for x-axis using Equation 2 and differentiated capacitance spectra at each temperature is superimposed using Equation 3.

$$E(\omega) = K_B T \ln\left(\frac{2\pi\nu_0 T^2}{\omega}\right) \quad (2)$$

$$N_t(E(\omega)) = -\frac{V_d}{qWkT} \omega \frac{dC}{d\omega} \quad (3)$$

where  $V_d$  is built in potential and  $W$  is depletion width, which are extracted from Capacitance-Voltage measurement.

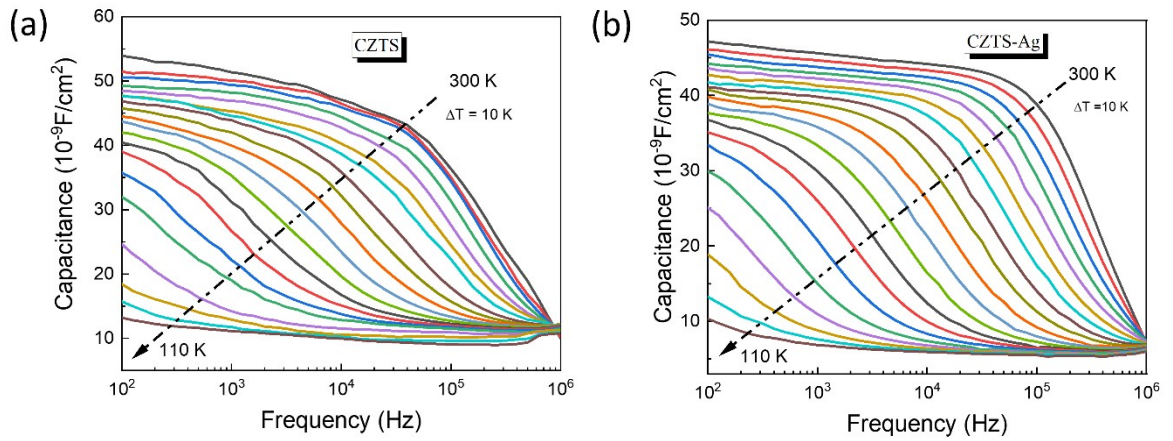

**Fig. S4** Admittance spectra of CZTS devices without Ag doping (a) and with 3% Ag doping (b), measured at temperature between 110 K and 300 K with a step of 10 K.

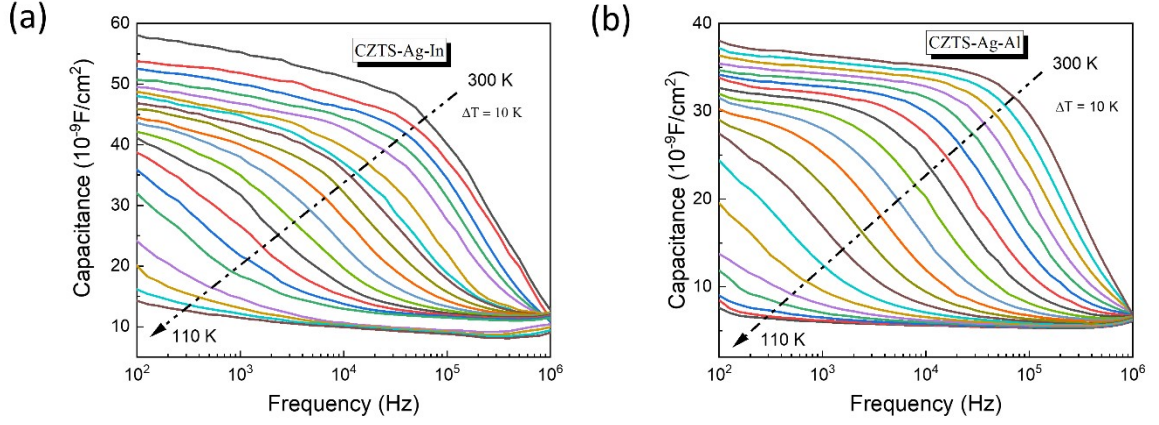

**Fig. S5** Admittance spectra of CZTS-Ag devices with In (a) and Al (b) interface doping, measured at temperature between 110 K and 300 K with a step of 10 K.

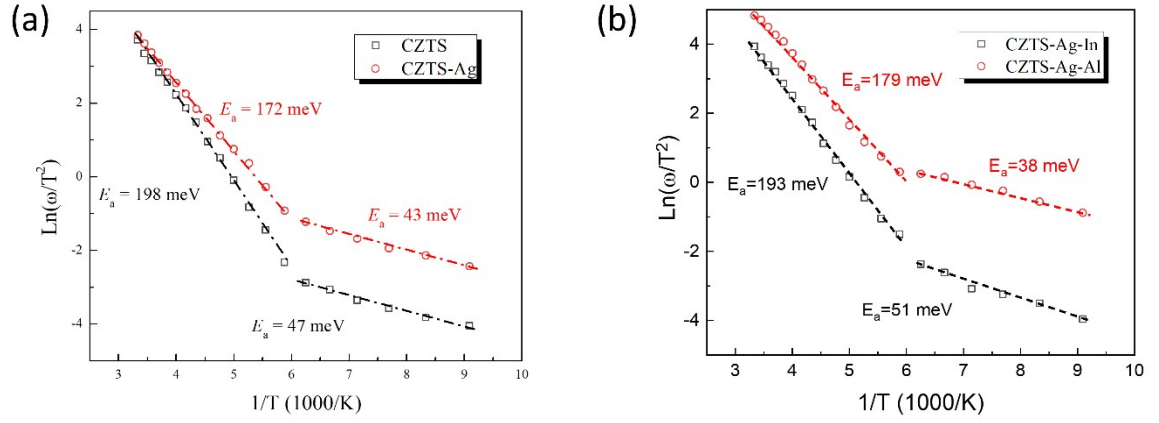

**Fig. S6** Arrhenius plot of the inflection frequencies determined from the derivative of the admittance spectra for (a) CZTS devices without and with 3% Ag doping (b) CAZTS devices with In and Al interface doping.

### Band alignment

The CBO can be estimated by  $CBO = (E_{gap}^b - E_{gap}^a) + (E_{VB}^b - E_{VB}^a) + V_{bb}$ , where  $E_{VB}^b$  and  $E_{VB}^a$  are the energy positions of the valence band edge of bulk CdS and bulk CZTS, while  $V_{bb}$  is the band bending, which can be obtained by the formula:

$$V_{bb} = (E_{CL}^a - E_{CL}^a(i)) + (E_{CL}^b(i) - E_{CL}^b), \text{ where } E_{CL}^a \text{ and } E_{CL}^b \text{ represent the core level energies}$$

of two elements in CZTS and CdS respectively, while  $E_{CL}^a(i)$  and  $E_{CL}^b(i)$  are the

corresponding core level energies measured at the interface. In CZTS the elements of

Cu, Zn and Sn were chosen and in CdS the element was Cd. Fig. S7 shows the band

bending values at different depth of CdS/CZTS interface for four CdS/CZTS heterojunctions with different doping. The binding energies of Cd 3d5/2 from CdS and Cu 2p3/2, Zn 2p3/2 and Sn 3d5/2 from CZTS were used. The calculated CBO values for four CdS/CZTS heterojunctions were shown in Table S2.

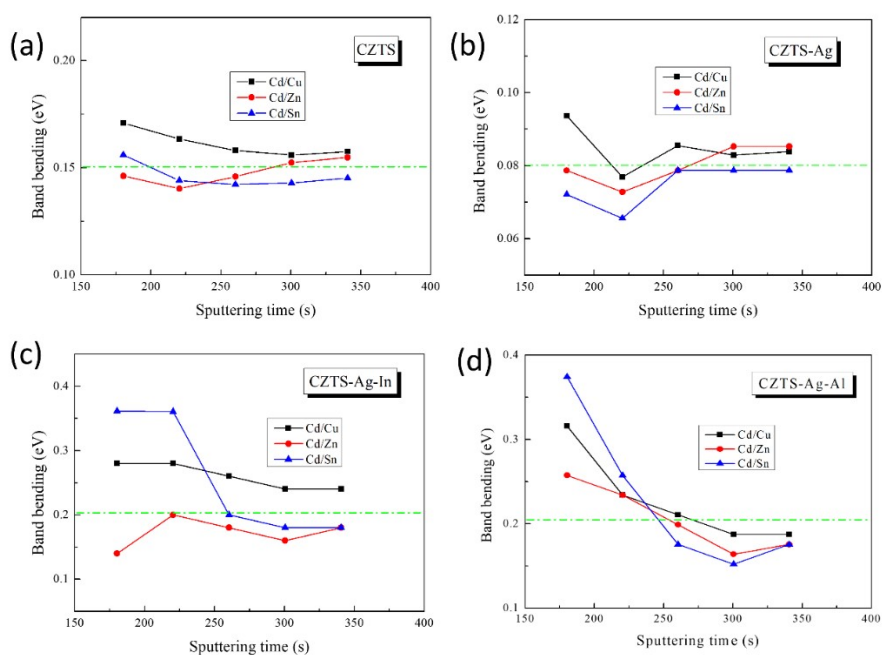

**Fig. S7** The band bending values (3 data sets) as function of sputtering time for (a) pure CZTS (b) CZTS with 3% Ag doping (c) CZTS-Ag with In-doping and (d) CZTS-Ag with Al-doping.

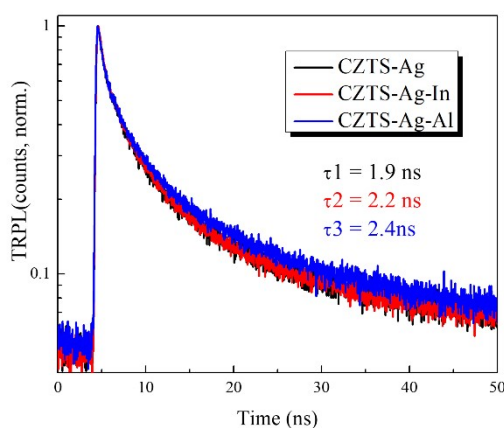

**Fig. S8.** Time-resolved photoluminescence decay at 532 nm excitation wavelength for CZTS devices with different interface doping.

**Table S2.** Summary of the results of band alignment for CZTS devices with different doping

| Device                | Average $V_{bb}$ [eV± 0.01eV] | VBM-CdS [eV] | VBM-CZTS [eV] | VBO [eV± 0.01eV] | $E_g$ -CdS [eV] | $E_g$ -CZTS [eV] | CBO [eV± 0.01eV] |
|-----------------------|-------------------------------|--------------|---------------|------------------|-----------------|------------------|------------------|
| CZTS/CdS              | 0.15                          | -1.38        | -0.15         | -1.08            | 2.41            | 1.50             | -0.14            |
| CZTS-Ag/CdS           | 0.08                          | -1.48        | -0.41         | -0.99            | 2.41            | 1.50             | -0.08            |
| CZTS-Ag/CdS-In doping | 0.21                          | -1.62        | -0.37         | -1.04            | 2.41            | 1.50             | -0.13            |
| CZTS-Ag/CdS-Al doping | 0.22                          | -1.58        | -0.41         | -0.95            | 2.41            | 1.50             | -0.05            |

**Table S3.** Device characteristics of CAZTS solar cells with different annealing temperatures (250–340 °C with 8 min) for In-doping.

| Devices-In-8 min | PCE [%] | $V_{oc}$ [mV] | FF [%] | $J_{sc}$ [mA/cm <sup>2</sup> ] | $E_g$ [eV] |
|------------------|---------|---------------|--------|--------------------------------|------------|
| Device-250       | 7.8     | 676           | 64     | 18.2                           | 1.50       |
| Device-280       | 9.2     | 708           | 68     | 19.1                           | 1.50       |
| Device-310       | 8.4     | 697           | 63     | 19.2                           | 1.50       |
| Device-340       | 7.4     | 645           | 59     | 19.5                           | 1.50       |

**Table S4.** Device characteristics of CAZTS solar cells with different annealing times (1–15 min at 280 °C) for In-doping.

| Devices-In-280 | PCE [%] | $V_{oc}$ [mV] | FF [%] | $J_{sc}$ [mA/cm <sup>2</sup> ] | $E_g$ [eV] |
|----------------|---------|---------------|--------|--------------------------------|------------|
| Device-1       | 7.1     | 676           | 61     | 17.3                           | 1.50       |
| Device-5       | 10.6    | 722           | 69     | 21.0                           | 1.50       |
| Device-10      | 9.2     | 703           | 67     | 19.2                           | 1.50       |
| Device-15      | 8.8     | 696           | 65     | 19.5                           | 1.50       |

**Table S5.** Device characteristics of CAZTS solar cells with different annealing temperatures (250–340 °C with 8 min) for Al-doping.

| Devices-Al-8 min | PCE [%] | $V_{oc}$ [mV] | FF [%] | $J_{sc}$ [mA/cm <sup>2</sup> ] | $E_g$ [eV] |
|------------------|---------|---------------|--------|--------------------------------|------------|
| Device-250       | 9.1     | 703           | 66     | 19.6                           | 1.50       |
| Device-280       | 9.4     | 714           | 68     | 19.4                           | 1.50       |
| Device-310       | 9.3     | 704           | 67     | 19.7                           | 1.50       |
| Device-340       | 8.2     | 667           | 64     | 19.2                           | 1.50       |

**Table S6.** Device characteristics of CAZTS solar cells with different annealing times (1–15 min at 280 °C) for Al-doping.

| Devices-Al-280 | PCE [%] | $V_{oc}$ [mV] | FF [%] | $J_{sc}$ [mA/cm <sup>2</sup> ] | $E_g$ [eV] |
|----------------|---------|---------------|--------|--------------------------------|------------|
| Device-1       | 7.4     | 671           | 62     | 17.7                           | 1.50       |
| Device-5       | 9.2     | 704           | 66     | 19.8                           | 1.50       |
| Device-10      | 10.4    | 737           | 69     | 20.1                           | 1.50       |
| Device-15      | 9.1     | 711           | 66     | 19.5                           | 1.50       |

**Table S7.** Summary of the results derived from C–V, DLCP and AS measurements for CZTS devices with different doping.

| Device     | $N_{CV}$              | $N_{DLCP}$            | Interface states                         | Defect density         | Carrier density        |
|------------|-----------------------|-----------------------|------------------------------------------|------------------------|------------------------|
|            | [cm <sup>-3</sup> ]   | [cm <sup>-3</sup> ]   | (relative values)<br>$N_{cv} - N_{DLCP}$ | AS [cm <sup>-3</sup> ] | AS [cm <sup>-3</sup> ] |
| CZTS       | $3.81 \times 10^{16}$ | $3.37 \times 10^{16}$ | $4.4 \times 10^{15}$                     | $3.64 \times 10^{16}$  | $1.48 \times 10^{16}$  |
| CZTS-Ag    | $2.14 \times 10^{16}$ | $1.98 \times 10^{16}$ | $1.6 \times 10^{15}$                     | $1.73 \times 10^{16}$  | $5.5 \times 10^{15}$   |
| CZTS-Ag-In | $3.43 \times 10^{16}$ | $2.98 \times 10^{16}$ | $4.5 \times 10^{15}$                     | $2.11 \times 10^{16}$  | $2.62 \times 10^{16}$  |
| CZTS-Ag-Al | $2.86 \times 10^{16}$ | $2.69 \times 10^{16}$ | $1.7 \times 10^{15}$                     | $1.65 \times 10^{16}$  | $1.34 \times 10^{16}$  |

**Table S8.** Summary of device characteristics for CZTS solar cells with best efficiency.

| Devices                              | $\eta$ (%) | $V_{oc}$ (mV) | FF (%) | $J_{sc}$ (mA/cm <sup>2</sup> ) | $E_g$ (eV) |
|--------------------------------------|------------|---------------|--------|--------------------------------|------------|
| Device-1 CZTS                        | 6.4        | 640           | 59     | 16.9                           | 1.50       |
| Device-2 CZTS-Ag                     | 7.6        | 671           | 64     | 17.5                           | 1.50       |
| Device-3 CZTS-Ag-In                  | 10.6       | 722           | 69     | 21.0                           | 1.50       |
| Device-4 CZTS-Ag-Al                  | 10.4       | 737           | 69     | 20.1                           | 1.50       |
| Device-5 CZTS-Ag-In-MgF <sub>2</sub> | 10.7       | 726           | 69     | 21.1                           | 1.50       |
| Device-6 CZTS-Ag-Al-MgF <sub>2</sub> | 11.2       | 734           | 71     | 21.2                           | 1.50       |
| Device-7 CZTS-Ag-In-AZO              | 10.4       | 708           | 67     | 22.1                           | 1.50       |
| Device-8 CZTS-Ag-Al-AZO              | 10.7       | 713           | 67     | 22.3                           | 1.50       |

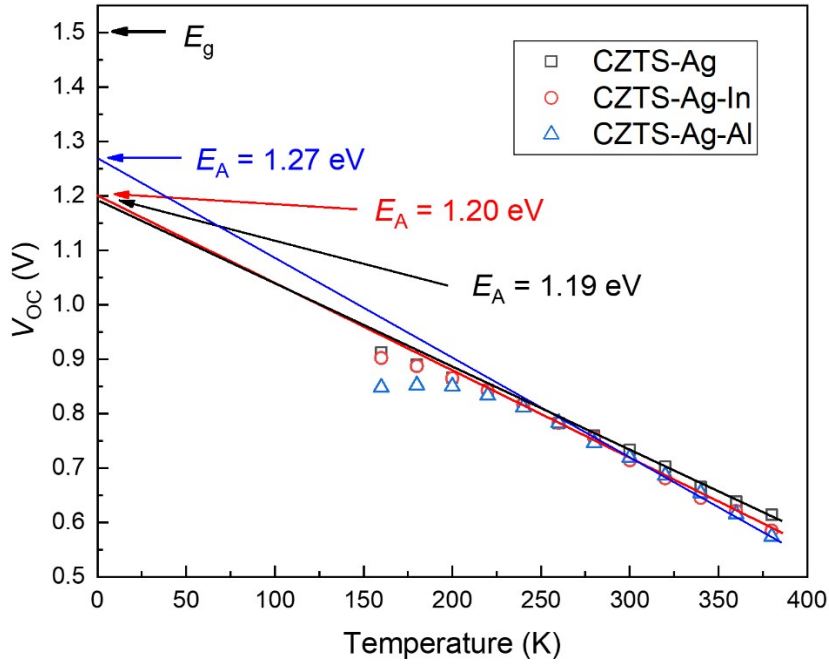

**Fig. S9** Temperature-dependent open circuit measurement for CZTS devices with different doping. The activation energy ( $E_A$ ) can be obtained by extrapolating the  $V_{OC}$  to a temperature of 0 K.  $E_g$  shows the bandgap of CZTS.

#### Dark $J$ - $V$ curves

The junction-dependent electrical behavior for Ag-based CZTS devices with different doping were systematically investigated and the dark  $J$ - $V$  curves with obvious rectifying characteristics are shown in Fig. S10a. The corresponding shunt conductance  $G$  (Fig. S10b), series resistance  $R$  (Fig. S10c), diode ideality factor  $A$  (Fig. S10c), and reverse saturation current density  $J_0$  (Fig. S10d) were obtained according to the general single exponential diode equation: <sup>1, 2</sup>

$$J = J_0 \exp \left[ \frac{q}{AkT} (V - RJ) \right] + GV - J_L$$

For Ag-based CZTS devices with different doping (without, with In and Al doping), the diode ideality factor  $A$  values are almost same (1.57, 1.54 and 1.45, respectively), indicating a good p-n junction quality. However, for CAZTS device with Al doping,



the shunt conductance  $G$  value and reverse saturation current density  $J_0$  are only  $0.017$   $\text{mS}/\text{cm}^2$  and  $7.1 \times 10^{-8} \text{ A}/\text{cm}^2$ , which is obviously lower than those of the devices without and with In doping. Because of better interface band alignment for device after Al doping, therefore a smaller reverse saturation current density can be achieved indicating better unilateral conductivity of the diode and closer to the ideal transistor.

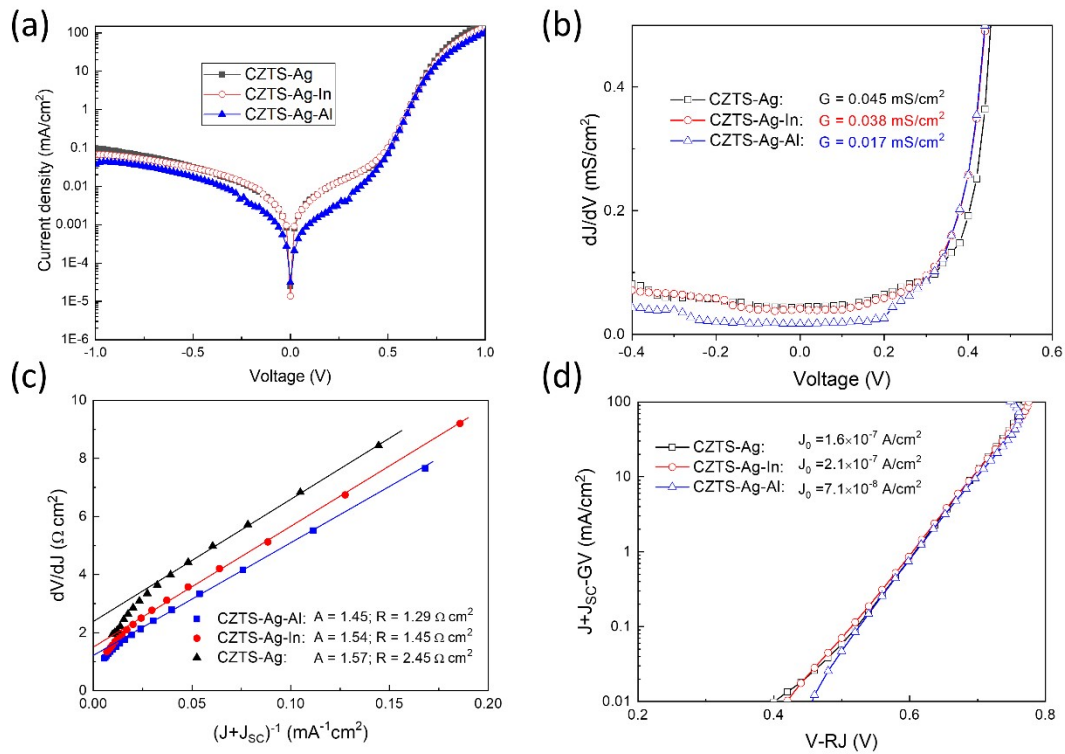

**Fig. S10** Electrical behaviors of the devices (CZTS-Ag, CZTS-Ag-In, and CZTS-Ag-Al): a) Dark J-V curves; b) Shunt conductance  $G$  characterization; c) Series resistance  $R$  and ideality factor  $A$  characterization; d) Reverse saturation current density  $J_0$  characterization.

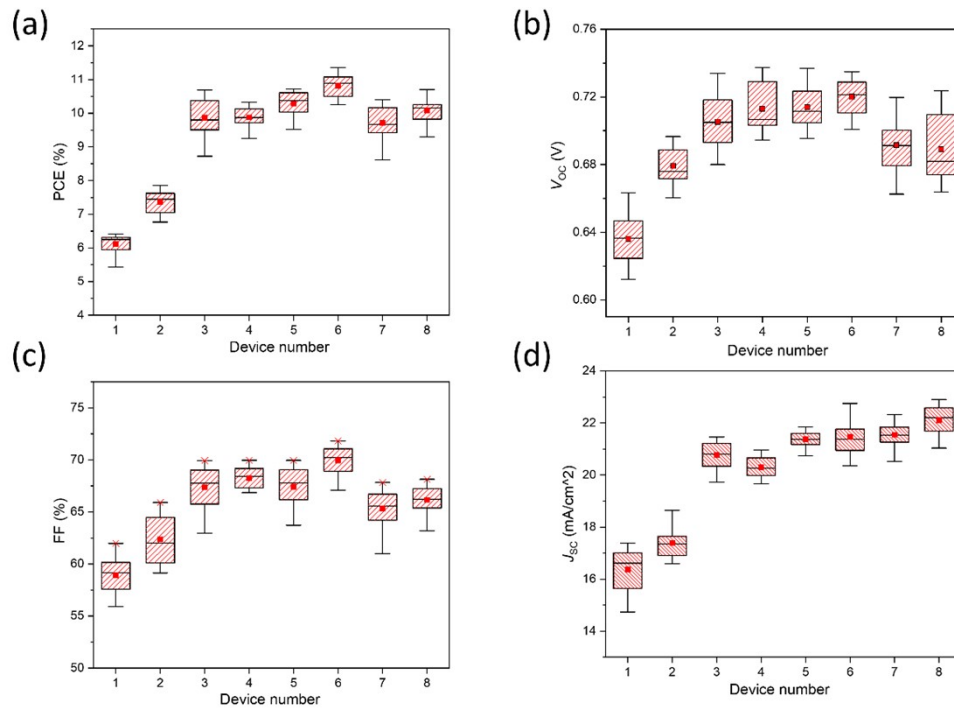

**Fig. S11** The box-plot diagrams of statistical data (from 16 devices) for JV parameters from devices with different interface doping. The device number 1-8 represents pure CZTS, CZTS-Ag, CZTS-Ag-In, CZTS-Ag-Al, CZTS-Ag-In-MgF<sub>2</sub>, CZTS-Ag-Al-MgF<sub>2</sub>, CZTS-Ag-In-AZO, CZTS-Ag-Al-AZO, respectively.

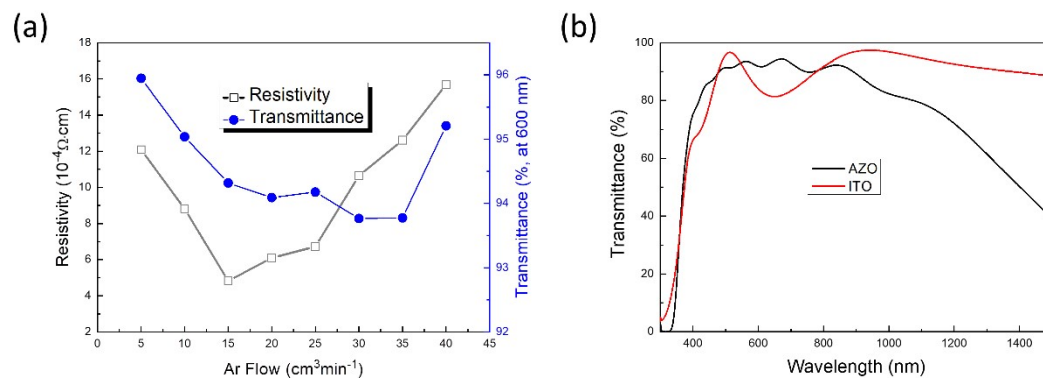

**Fig. S12** a) the resistivity and transmittance (at 600 nm) of AZO thin films with different Ar flow; b) the transmittance of ITO and AZO thin films with different wavelength.

References:

1. J. R. Sites and P. H. Mauk, *Solar Cells*, 1989, **27**, 411-417.
2. S. S. Hegedus and W. N. Shafarman, *Progress in Photovoltaics: Research and Applications*, 2004, **12**, 155-176.
